# Supplementary material for: Exploring novel ligands with strong electron delocalization for high-performance blue CsPbBr3 perovskite nanoplatelets
Source: Royal Society of Chemistry journal article supplement (doi:10.1039/d2tc01687g), 2022-01-01
Supplement: d2tc01687g1.pdf [file d2tc01687g1.pdf]

## Supporting Information

### **Exploring Novel Ligands with Strong Electron Delocalization for High-performance Blue CsPbBr<sub>3</sub> Perovskite Nanoplatelets**

*Zhuoqi Wen, Zhongjie Cui, Haiyang He, Dan Yang, Shiliang Mei\*, Bobo Yang, Zhiyong Xiong, Shanliang Song, Rui Bao, Wanlu Zhang, Guichuan Xing, Fengxian Xie\* and Ruiqian Guo\**

#### **Experimental Section**

*Chemicals:* Caesium carbonate (Cs<sub>2</sub>CO<sub>3</sub>, Aladdin, 99.99%), lead(II) bromide (PbBr<sub>2</sub>, Macklin, 99.99%), oleic acid (OA, Aladdin, AR), oleylamine (OAm, Aladdin, C18:80-90%), 2-butynoic acid (BtA, Macklin, 98%), butyric acid (BA, Macklin, 99%), crotonic acid (CA, Macklin, ≥99.9%), phenylpropionic acid (PA, Aladdin, ≥98.0%), 2-pentynoic acid (PtA, Aladdin, 97%), 1-octadecene (ODE, Aladdin, >90.0%), toluene (Tol, Sinopharm, ≥99.5%), acetone (Sinopharm, 99.5%), n-octane (Sinopharm, 98%) and methyl acetate (Macklin, 98%) were purchased without further purification.

*Preparation of precursors:* Cs-precursor was prepared by dissolving 0.4 mmol Cs<sub>2</sub>CO<sub>3</sub> in 20 mL OA at 100 °C under continuous stirring. Pb-precursor was prepared by dissolving 0.3 mmol PbBr<sub>2</sub> in 10 mL Tol with 300 μL of OAm and OA at 100 °C. Different solution for post-treatment were prepared by mixing 1 mL OAm with 1 mL OA (OA/OAm), 3.15 mmol BtA (BtA/OAm), 3.15 mmol BA (BA/OAm), 3.15 mmol

CA (CA/OAm), 3.15 mmol PA (PA/OAm) and 3.15 mmol PtA (PtA/OAm) into 10 mL Tol.

*Preparation of perovskite NPLs (n=3):* The perovskite NPLs were synthesized according to reported procedures with some modifications.<sup>1</sup> In a typical experiment, 450  $\mu$ L Cs-precursor was injected into 3 mL Pb-precursor at room temperature with vigorous stirring. After 1 min, 5 mL acetone was added for initiating the formation of NPLs. Then, the turbid solution was centrifuged at 9000 rpm for 2 min and the obtained precipitate was redispersed in 2 mL Tol.

*The post-treatment of NPLs:* 400  $\mu$ L of solution for post-treatment were dropped into the NPLs solution under vigorous stirring and further incubated in ambient atmosphere for 2 h. When investigating the influence of the concentration of ligands on NPLs, the precipitate was redispersed in 20 mL Tol and 10-80  $\mu$ L of solution for post-treatment were added into 1 mL sample, respectively.

*Characterizations:* Absorption spectra were obtained through 759S Ultraviolet-visible spectrophotometer (Lengguang). PL spectra were recorded on F97XP spectrometer (Lengguang) with the excitation wavelength of 355 nm. Absolute PLQY values were measured using an integrating sphere within FluoroMax+ spectrometer (HORIBA) with the excitation wavelength of 355 nm. Transmission electron microscopy (TEM), high-resolution TEM (HRTEM) and selected area electron diffraction (SAED) images were obtained on JEM-2100F microscope (JEOL). Fourier transform infrared spectroscopy (FTIR) were obtained by Nicolet iS10 FTIR spectrophotometer (ThermoFisher). <sup>1</sup>H-nuclear magnetic resonance (<sup>1</sup>H-NMR) spectra were recorded on

AVANCE III HD 500MHz NMR spectrometer (Bruker). Time-resolved photoluminescence (TRPL) spectra were recorded on FS4 fluorescence spectrophotometer (Edinburgh). X-Ray Photoelectron Spectroscopy (XPS) were obtained on Axis Ultra DLD (Kratos). The XRD pattern was obtained using an X-ray diffractometer (Rigaku SmartLab 9kW) based on the NPLs films.

*Stability test of NPLs:* The solution of NPLs-OA/OAm, NPLs-BtA/OAm, NPLs-PA/OAm and NPLs-PtA/OAm were incubated at 80 °C or exposed to 365 nm UV light with the power density of 4 W cm<sup>-2</sup> with vigorous stirring and their PL spectra were recorded.

*DFT calculations:* First-principles calculations were carried out using DFT with generalized gradient approximation (GGA) of Perdew-Burke-Ernzerhof (PBE) implemented in the Vienna Ab-Initio Simulation Package (VASP).<sup>2,3</sup> The valence electronic states were expanded on the basis of plane waves with the core-valence interaction represented using the projector augmented plane wave (PAW) approach and a cutoff of 520 eV.<sup>4</sup> A  $\Gamma$ -centered k-mesh of  $2 \times 2 \times 1$  was used for the surface calculations. Convergence is achieved when the forces acting on ions become smaller than 0.02 eV Å<sup>-1</sup>.

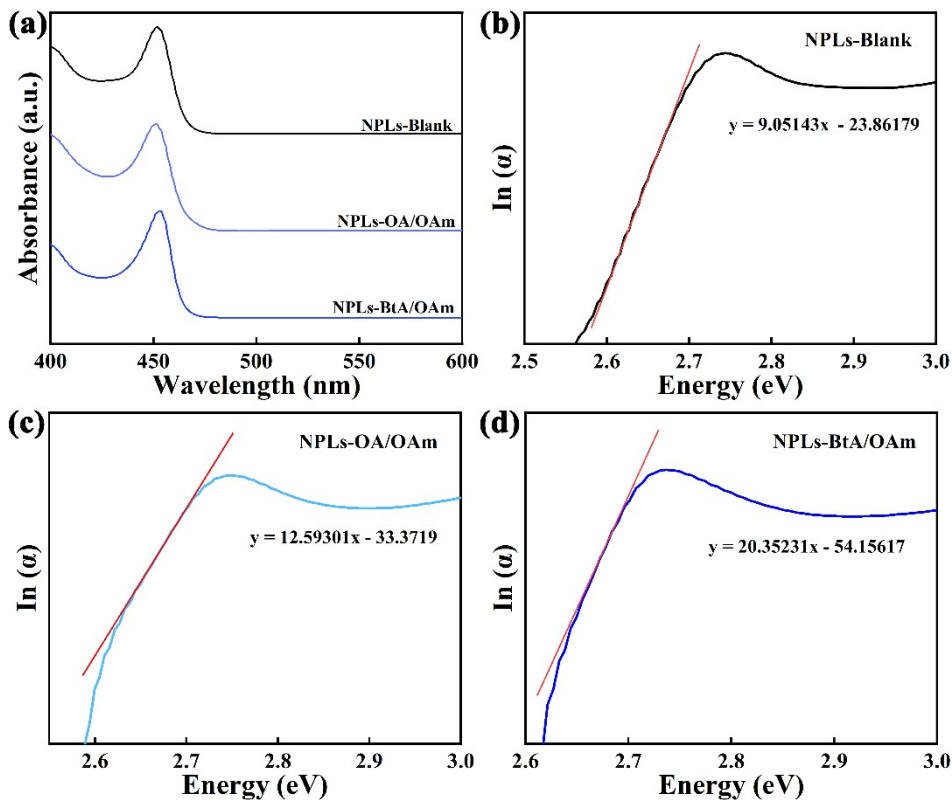

Figure S1. (a) Absorption spectra of NPLs-Blank, NPLs-OA/OAm and NPLs-BtA/OAm. Urbach energy diagrams of NPLs-Blank (b), NPLs-OA/OAm (c) and NPLs-BtA/OAm (d).

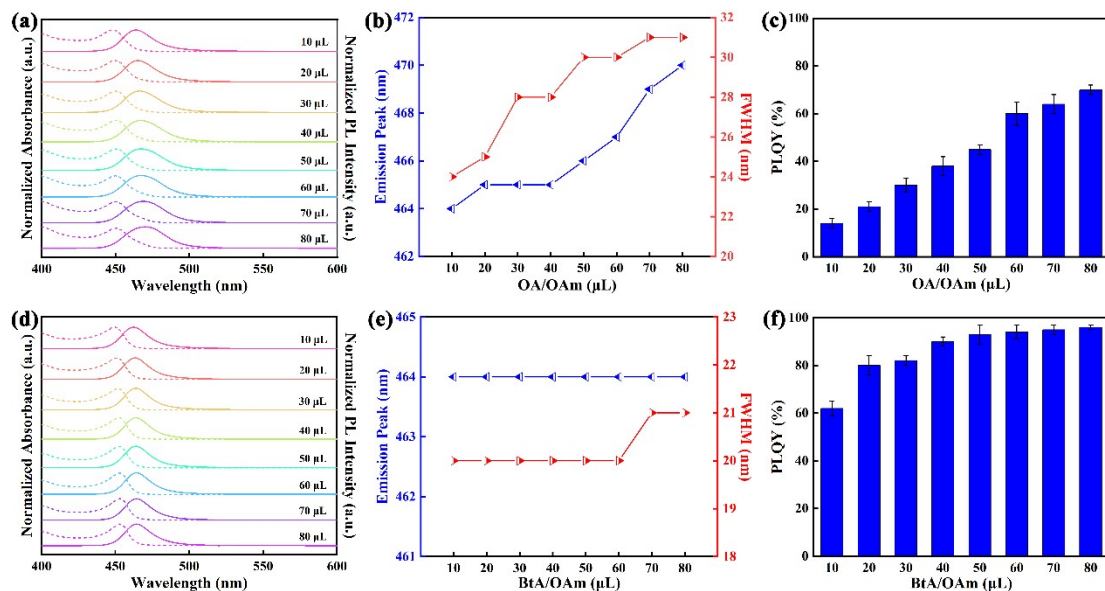

Figure S2. Normalized absorbance and PL spectra of NPLs-OA/OAm (a) and NPLs-BtA/OAm (d) with different ligand additions. The influence of ligand additions on emission peak and FWHM of NPLs-OA/OAm (b) and NPLs-BtA/OAm (e). The enhancement of ligand additions on PLQY of NPLs-OA/OAm (c) and NPLs-BtA/OAm (f).

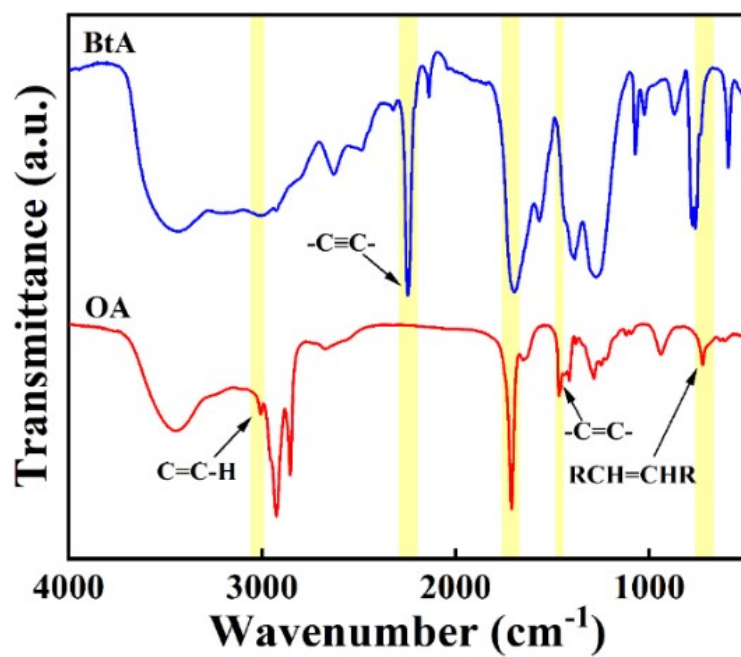

Figure S3. FTIR spectra of BtA and OA.

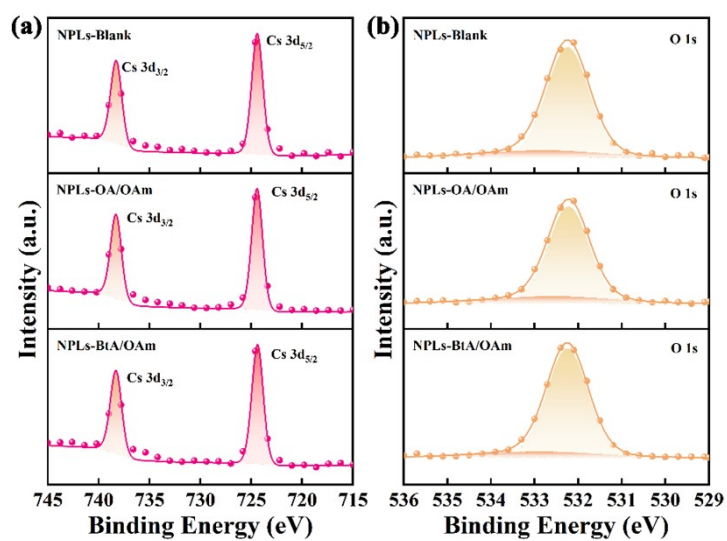

Figure S4. High-resolution XPS analyses of Cs 3d spectra (a) and O 1s spectra of original and post-treated NPLs.

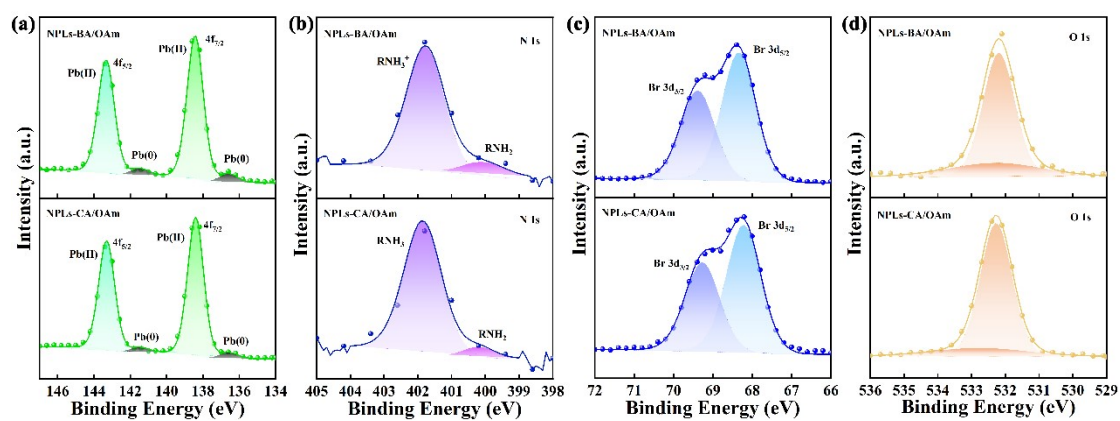

Figure S5. High-resolution XPS analyses of Pb 4f spectra (a), N 1s spectra (b) Br 3d spectra (c) and O 1s spectra (d) of NPLs-BA/OAm and NPLs-CA/OAm.

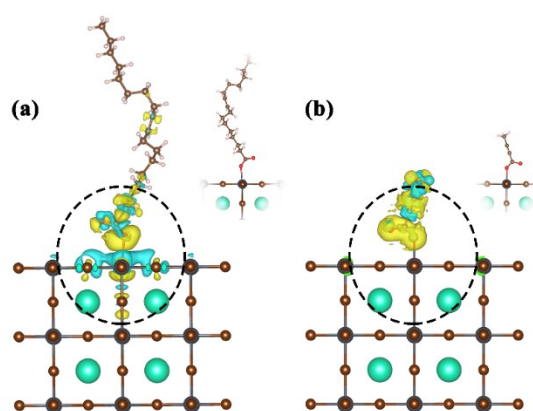

Figure S6. Deformation charge density of NPLs treated with OA (a) and BtA (b).

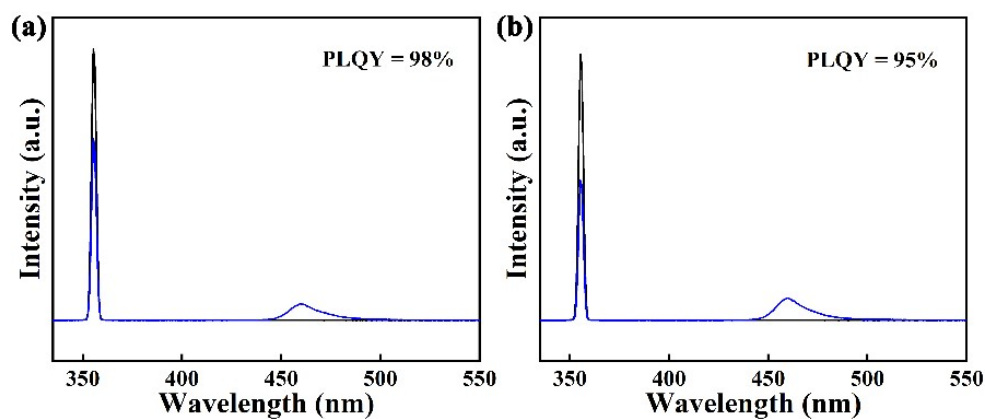

Figure S7. (a) PLQY measurement of NPLs-PA/OAm. (b) PLQY measurement of NPLs-PtA/OAm.

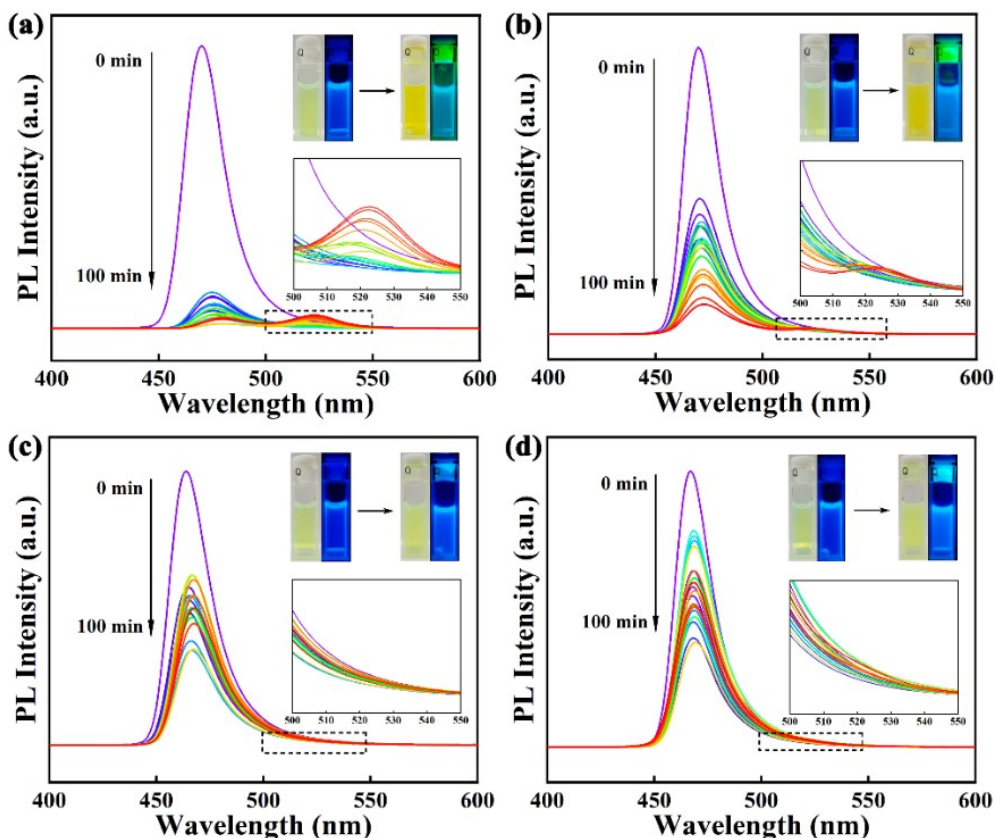

Figure S8. PL spectra of NPLs-OA/OAm (a), NPLs-BtA/OAm (b), NPLs-PA/OAm (c) and NPLs-PtA/OAm (d) under 80 °C for different times. The insets show photographs of NPLs before and after heating under ambient and UV light respectively.

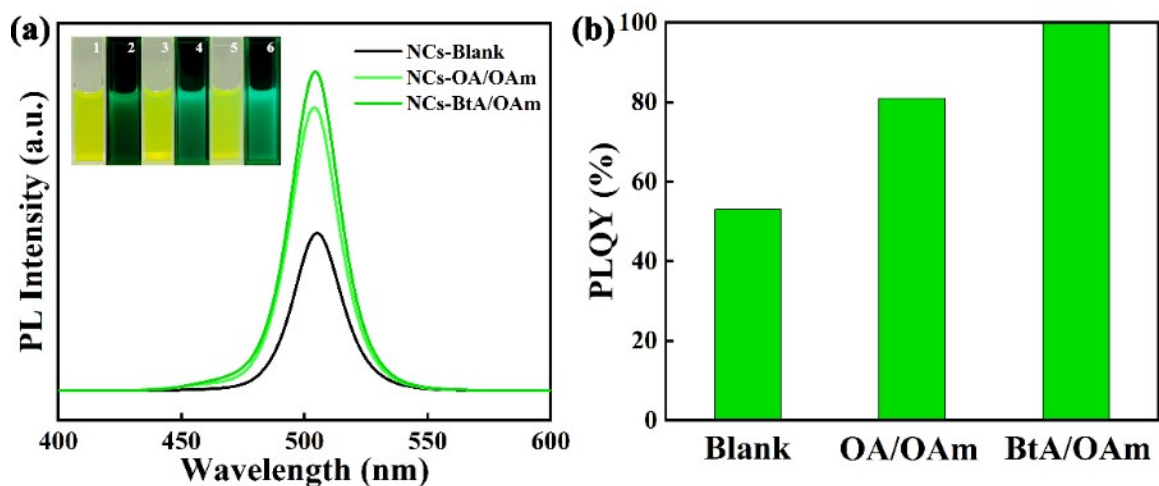

Figure S9. (a) PL spectra of original and post-treated NCs. The inset shows the photographs of NCs-Blank (1, 2), NCs-OA/OAm (3, 4) and NCs-BtA/OAm (5, 6) under ambient and UV light. (b) The enhancement of different ligands on PLQY of NCs.

Table S1. PL decay parameters of NPLs in Figure 1c.

| Sample       | PLQY (%) | $\tau_1$ (ns) | $A_1$ | $\tau_2$ (ns) | $A_2$ | $\tau_{ave}$ (ns) | $k_r$ (ns <sup>-1</sup> ) | $k_{nr}$ (ns <sup>-1</sup> ) |
|--------------|----------|---------------|-------|---------------|-------|-------------------|---------------------------|------------------------------|
| NPLs-Blank   | 12±2     | 4.1           | 0.5   | 8.5           | 0.5   | 6.3               | 0.02                      | 0.139                        |
| NPLs-OA/OAm  | 35±5     | 5.2           | 0.63  | 11.4          | 0.37  | 7.5               | 0.047                     | 0.087                        |
| NPLs-BtA/OAm | 87±5     | 6.1           | 0.53  | 15.5          | 0.47  | 10.5              | 0.083                     | 0.012                        |

Notes:  $\tau_{ave} = \sum A_i \tau_i$ ;  $k_r = PLQY/\tau_{ave}$ ;  $k_{nr} = (1 - PLQY)/\tau_{ave}$ .

Table S2. Normalized element content of different NPLs measured by XPS.

| Sample       | Cs   | Pb | Br   | N    |
|--------------|------|----|------|------|
| NPLs-Blank   | 0.75 | 1  | 2.83 | 0.87 |
| NPLs-OA/OAm  | 0.63 | 1  | 2.94 | 1.13 |
| NPLs-BtA/OAm | 0.78 | 1  | 2.88 | 1.63 |
| NPLs-BA/OAm  | 0.87 | 1  | 2.85 | 0.68 |
| NPLs-CA/OAm  | 0.82 | 1  | 2.86 | 0.93 |

Table S3. Optical characteristics of blue-emitting CsPbBr<sub>3</sub> NPLs published to date.

| Sample | PL (nm) | PLQY (%)  | Stability                                                            | Ref.      |
|--------|---------|-----------|----------------------------------------------------------------------|-----------|
| 1      | 460     | 14 (film) | No                                                                   | 5         |
| 2      | 450     | 40 (film) | 30 min (heating at 50 °C)                                            | 6         |
| 3      | 460     | ~70       | No                                                                   | 7         |
| 4      | 462     | 96        | No                                                                   | 8         |
| 5      | 457     | 85        | No                                                                   | 9         |
| 6      | 460     | 98        | 1.5 year (stored in air)                                             | 10        |
| 7      | 466     | 100       | 120 h (395 nm, 60 mW cm <sup>-2</sup> )                              | 11        |
| 8      | 450     | 87        | 30 min (heating at 70 °C)<br>30 min (325 nm, 7 W cm <sup>-2</sup> )  | 12        |
| 9      | 460     | 60        | No                                                                   | 13        |
| 10     | 462     | 10        | No                                                                   | 14        |
| 11     | 460     | 98        | 120 min (400 nm, 110 mW cm <sup>-2</sup> )                           | 15        |
| 12     | 465     | 70        | 68 h (stored in air)                                                 | 16        |
| 13     | 464     | 98        | 100 min (heating at 80 °C)<br>70 min (365 nm, 4 W cm <sup>-2</sup> ) | This work |



## REFERENCE

- 1 S. Peng, Q. Wei, B. Wang, Z. Zhang, H. Yang, G. Pang, K. Wang, G. Xing, X. W. Sun and Z. Tang, *Angew. Chemie Int. Ed.*, 2020, **59**, 22156–22162.
- 2 J. P. Perdew, K. Burke and M. Ernzerhof, *Phys. Rev. Lett.*, 1996, **77**, 3865–3868.
- 3 G. Kresse and J. Furthmüller, *Phys. Rev. B*, 1996, **54**, 11169–11186.
- 4 P. E. Blöchl, *Phys. Rev. B*, 1994, **50**, 17953–17979.
- 5 R. L. Z. Hoye, M. L. Lai, M. Anaya, Y. Tong, K. Gałkowski, T. Doherty, W. Li, T. N. Huq, S. Mackowski, L. Polavarapu, J. Feldmann, J. L. Macmanus-Driscoll, R. H. Friend, A. S. Urban and S. D. Stranks, *ACS Energy Lett.*, 2019, **4**, 1181–1188.
- 6 J. Shamsi, D. Kubicki, D. Kubicki, M. Anaya, Y. Liu, K. Ji, K. Frohna, C. P. Grey, R. H. Friend, S. D. Stranks and S. D. Stranks, *ACS Energy Lett.*, 2020, **5**, 1900–1907.
- 7 H. Wang, F. Ye, J. Sun, Z. Wang, C. Zhang, J. Qian, X. Zhang, W. C. H. Choy, X. W. Sun, K. Wang and W. Zhao, *ACS Energy Lett.*, 2022, **7**, 1137–1145.
- 8 Y. Wu, C. Wei, X. Li, Y. Li, S. Qiu, W. Shen, B. Cai, Z. Sun, D. Yang, Z. Deng and H. Zeng, *ACS Energy Lett.*, 2018, **3**, 2030–2037.
- 9 W. Yin, M. Li, W. Dong, Z. Luo, Y. Li, J. Qian, J. Zhang, W. Zhang, Y. Zhang, S. V. Kershaw, X. Zhang, W. Zheng and A. L. Rogach, *ACS Energy Lett.*, 2021, 477–484.
- 10 S. Su, J. Tao, C. Sun, D. Xu, H. Zhang, T. Wei, Z. H. Zhang, Z. Wang, C. Fan and W. Bi, *Chem. Eng. J.*, , DOI:10.1016/j.cej.2021.129612.
- 11 H. Huang, W. Zhao, H. Yang, X. Zhang, J. Su, K. Hu, Z. Nie, Y. Li and J. Zhong, *J. Mater. Chem. C*, 2021, **9**, 5535–5543.
- 12 H. Lin, Q. Wei, K. W. Ng, J. Dong, J. Li, W. Liu, S. Yan, S. Chen, G. Xing, X. Tang, Z. Tang and S. Wang, *Small*, 2021, **17**, 2101359.
- 13 B. J. Bohn, Y. Tong, M. Gramlich, M. L. Lai, M. Döblinger, K. Wang, R. L. Z. Hoye, P. Müller-Buschbaum, S. D. Stranks, A. S. Urban, L. Polavarapu and J. Feldmann, *Nano Lett.*, 2018, **18**, 5231–5238.
- 14 Y. Bekenstein, B. A. Koscher, S. W. Eaton, P. Yang and A. P. Alivisatos, *J. Am. Chem. Soc.*, 2015, **137**, 16008–16011.
- 15 Q. Zeng, Y. Du, J. Jiang, Q. Yu and Y. Li, *J. Phys. Chem. Lett.*, 2021, **12**, 2668–2675.
- 16 C. Zhang, Q. Wan, B. Wang, W. Zheng, M. Liu, Q. Zhang, L. Kong and L. Li, *J. Phys. Chem. C*, 2019, **123**, 26161–26169.
